# Supplementary material for: Resonant defect states of the SnO2:Ta transparent conductive oxide revealed by excitation wavelength-dependent Raman spectroscopy and hybrid functional DFT calculations
Source: Royal Society of Chemistry journal article supplement (doi:10.1039/d4ta08693g), 2025-01-01
Supplement: d4ta08693g1.pdf [file d4ta08693g1.pdf]

## Supporting information

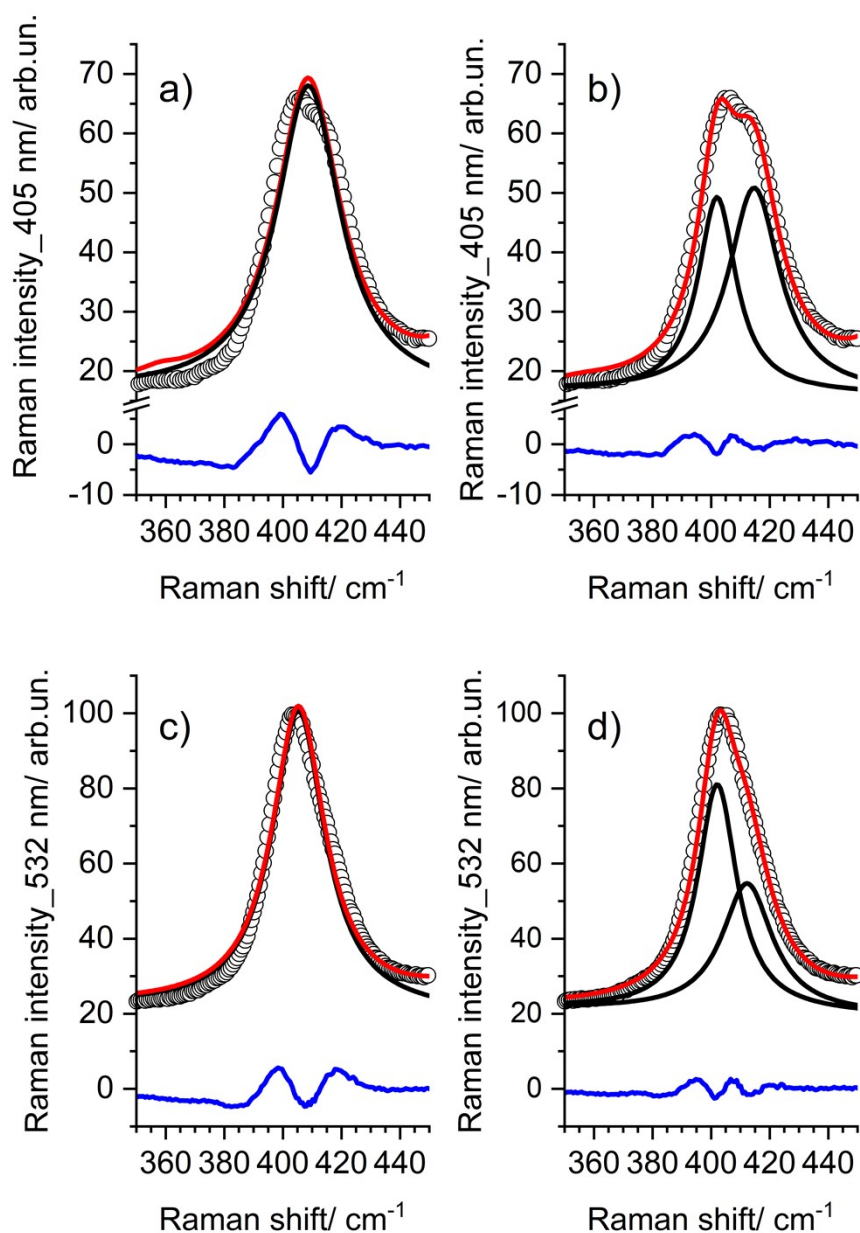

SI 1: Comparison of spectra fits for the  $D_1$  line spectral range measured with two different laser lines. a) one Lorentzian line fit, 405 nm excitation, b) two Lorentzian line fit, 405 nm excitation, c) one Lorentzian line fit, 532 nm excitation, d) two Lorentzian line fit, 532 nm excitation. Measured data ( $\circ$ ), Cumulative fits (red lines), individual line fits (black lines), fit residue (blue lines).

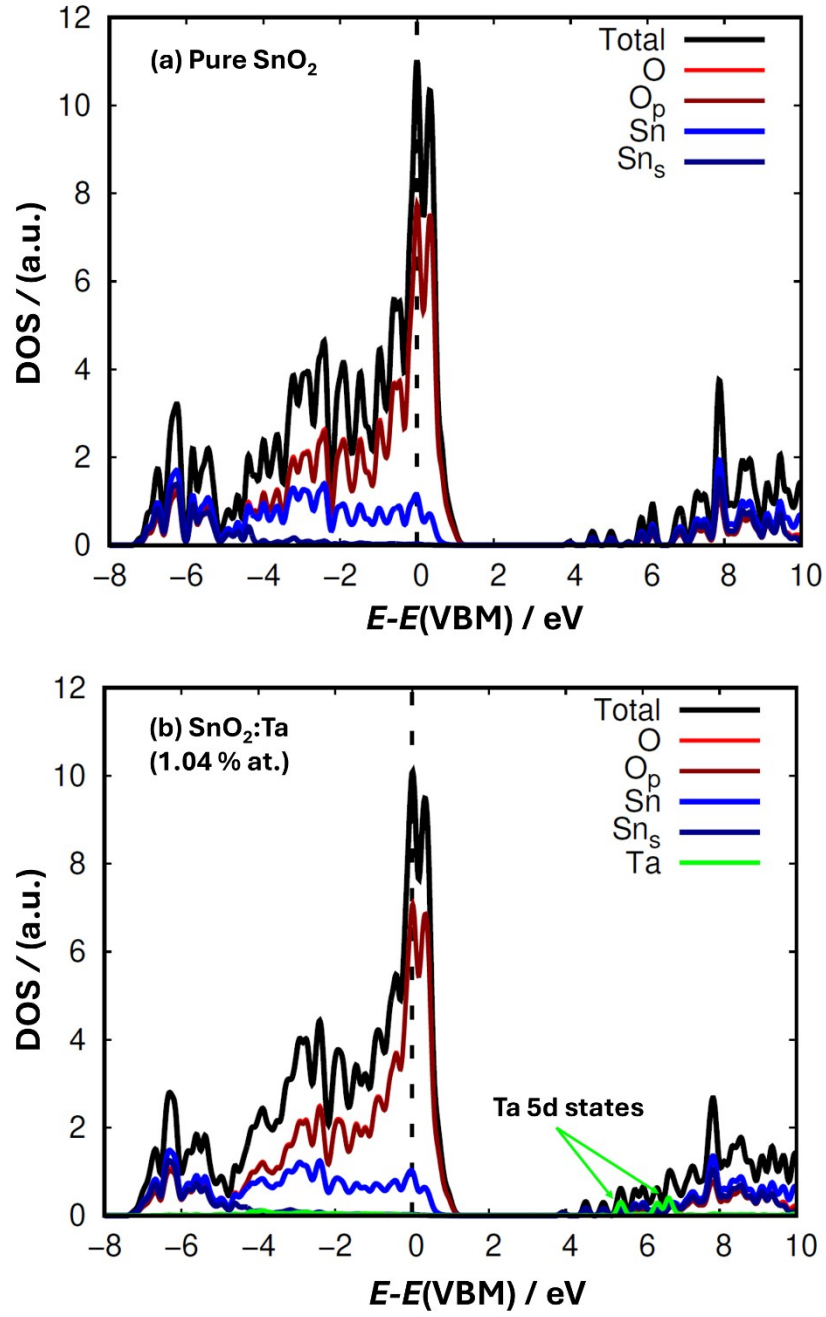

SI 2: Calculated DOS and PDOS of pure  $\text{SnO}_2$  (a) and  $\text{SnO}_2:\text{Ta}$  (1.04 % at.) showing the contribution of O 2p-orbitals and Sn s-orbitals.

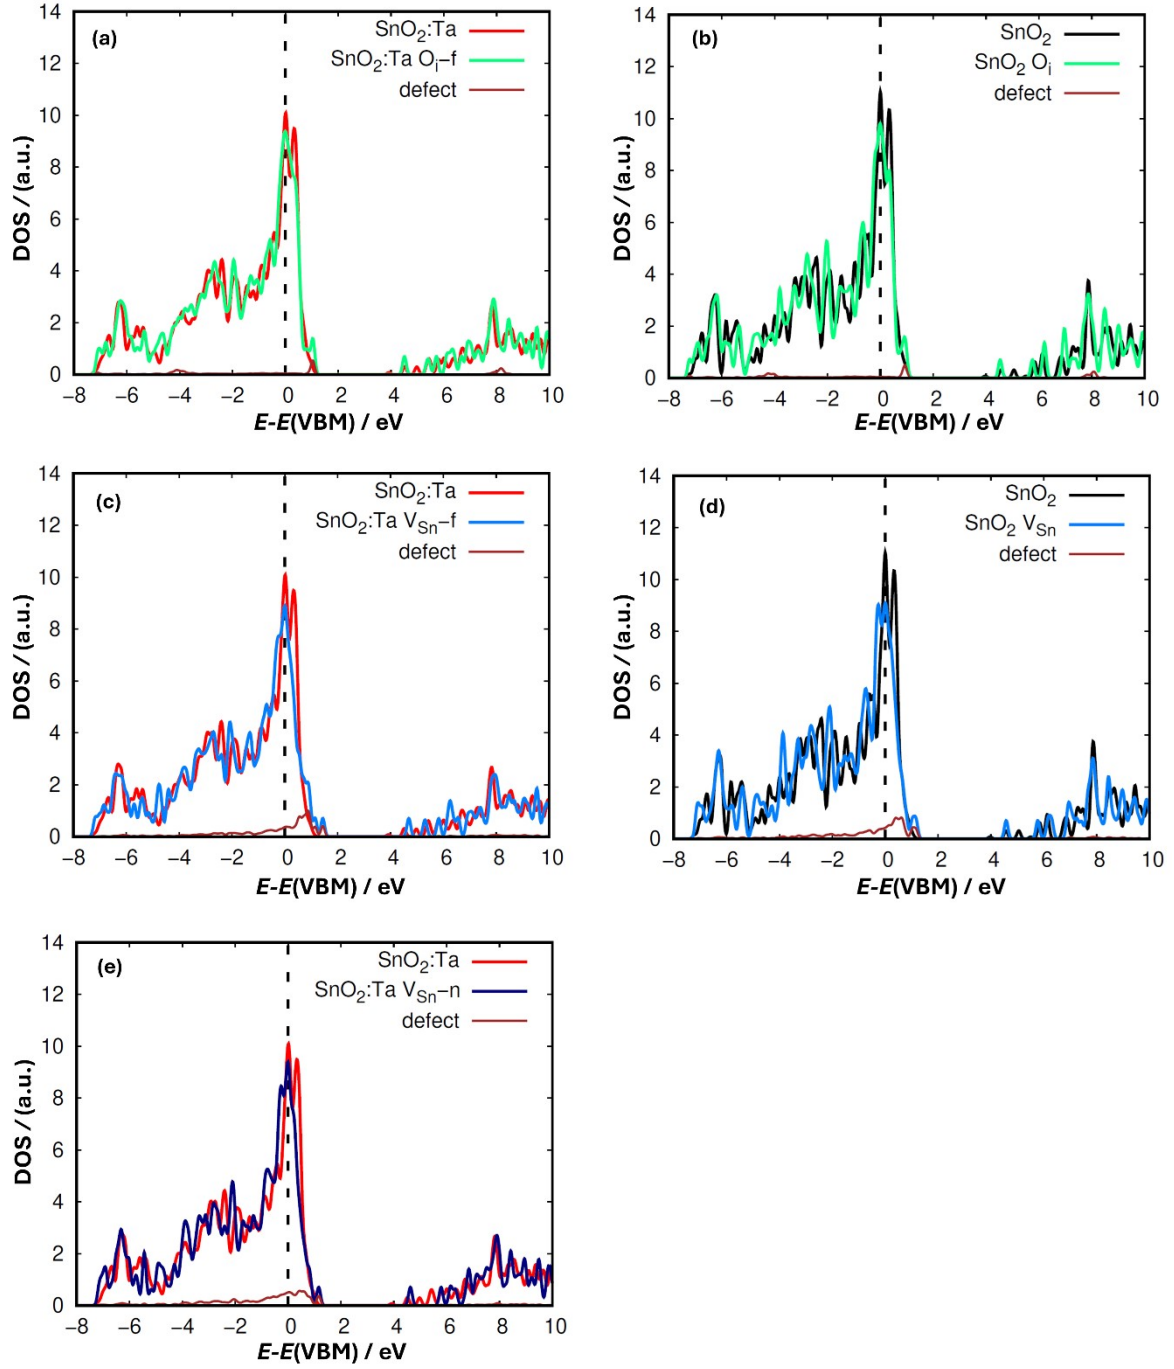

SI 3: Calculated total and defect density of states of  $\text{SnO}_2$  and  $\text{SnO}_2:\text{Ta}$  without and with additional point defects. (a)  $\text{SnO}_2:\text{Ta}$  with and without  $\text{O}_\text{I}$ -far defect; (b)  $\text{SnO}_2$  with and without  $\text{O}_\text{I}$  defect; (c)  $\text{SnO}_2:\text{Ta}$  with and without  $\text{V}_{\text{Sn}}$ -far defect; (d)  $\text{SnO}_2$  with and without  $\text{V}_{\text{Sn}}$  defect; (e)  $\text{SnO}_2:\text{Ta}$  with and without  $\text{V}_{\text{Sn}}$ -close defect.

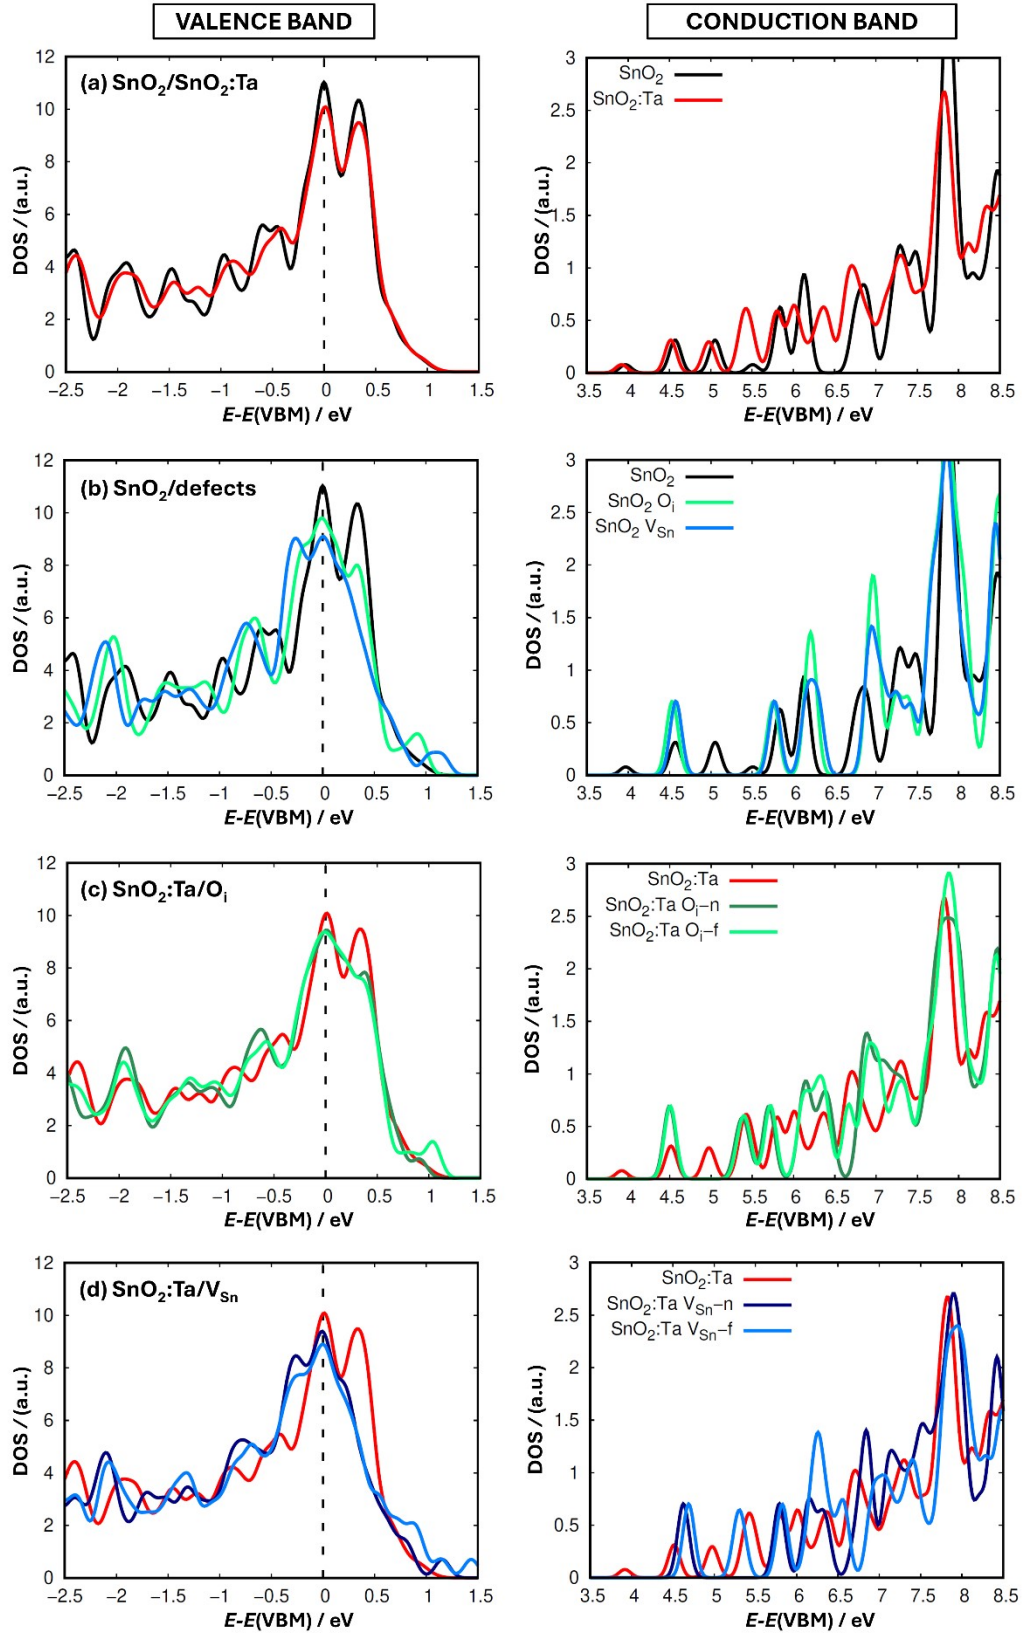

SI 4: Enlarged VBM and the CBM regions of the density of states of  $\text{SnO}_2$  and  $\text{SnO}_2:\text{Ta}$  without and with additional point defects.

| No. | File name            | Model structure                | Raman line     |
|-----|----------------------|--------------------------------|----------------|
| 1   | D1_SnO2-Ta_V-Sn-far  | SnO <sub>2</sub> :Ta_V-Sn-far  | D <sub>1</sub> |
| 2   | D1_SnO2-Ta_V-Sn-near | SnO <sub>2</sub> :Ta_V-Sn-near | D <sub>1</sub> |
| 3   | D2_SnO2-Ta_V-Sn-near | SnO <sub>2</sub> :Ta_V-Sn-near | D <sub>2</sub> |
| 4   | D2_SnO2-Ta_O-i-far   | SnO <sub>2</sub> :Ta_O-i-far   | D <sub>2</sub> |
| 5   | L4__SnO2-Ta_O-i-far  | SnO <sub>2</sub> :Ta_O-i-far   | L <sub>4</sub> |
| 6   | L5__SnO2-Ta_O-i-far  | SnO <sub>2</sub> :Ta_O-i-far   | L <sub>5</sub> |

SI 5: xyz-files for the visualization of the characteristic vibrational modes responsible for the characteristic Raman lines D<sub>1</sub>, D<sub>2</sub>, L<sub>4</sub>, and L<sub>5</sub> of SnO<sub>2</sub>:Ta (1.25 at.% Ta) thin films.
